# Supplementary material for: A size-matched POM@MOF composite catalyst for highly efficient and recyclable ultra-deep oxidative fuel desulfurization
Source: Royal Society of Chemistry journal article supplement (doi:10.1039/c8qi00295a), 2018-01-01
Supplement: c8qi00295a1.pdf [file c8qi00295a1.pdf]

*Electronic Supplementary Information (ESI) for*

**A size-matched POM@MOF composite catalyst for highly efficient  
and recyclable ultra-deep oxidative fuel desulfurization**

Yun-Lei Peng,<sup>‡,a</sup> Jingyi Liu,<sup>‡,a</sup> Hai-Feng Zhang,<sup>a</sup> Dong Luo,<sup>b</sup> Dan Li<sup>\*,b</sup>

<sup>a</sup> Department of Chemistry, Shantou University, Guangdong 515063, P. R. China

<sup>b</sup> College of Chemistry and Materials Science, Jinan University, Guangzhou 510632, P. R. China.

Email: [danli@jnu.edu.cn](mailto:danli@jnu.edu.cn)

<sup>‡</sup> The authors equally contributed to the work.

## Characterization methods

All reagents and solvents employed were commercially available and used as received without further purification. Fourier transform Infrared spectra (FT-IR) were obtained in KBr disks on a Nicolet Avatar 360 FT-IR spectrometer in the range of 4000-400  $\text{cm}^{-1}$ . Elemental analyses (C, H, N) was performed using a Vario EL III CHNS elemental analyzer. Thermogravimetric analysis (TGA) was performed on TA Instruments Q50. Thermogravimetric Analyzer was performed under nitrogen flow of (40  $\text{mL min}^{-1}$ ) at a typical heating rate of 10  $^{\circ}\text{C min}^{-1}$ . Powder X-ray diffraction (PXRD) experiments were performed on a D8 Advance X-ray diffractometer with Cu  $K\alpha$  radiation ( $\lambda = 1.5418 \text{ \AA}$ ). High Performance Liquid Chromatography (HPLC) experiments were performed on Agilent Technologies 1100 with a Hypersil ODS column. Atomic absorption spectroscopy (AAS) was performed on Solaar M6 MK2 equipment. Scanning electron microscopy (SEM) and energy dispersive spectroscopy (EDS) analysis were carried out on the S-4800 Field Emission Scanning Electron Microscope (Hitachi, Japan).

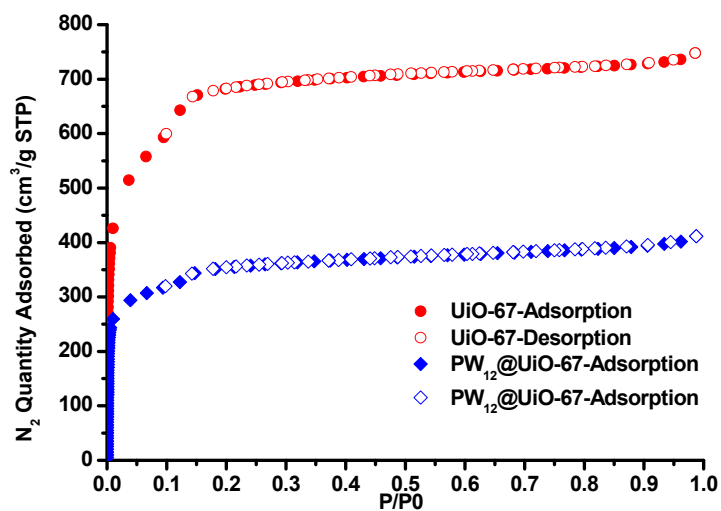

**Fig. S1** N<sub>2</sub> adsorption/desorption isotherms of UiO-67 and PW<sub>12</sub>@UiO-67.

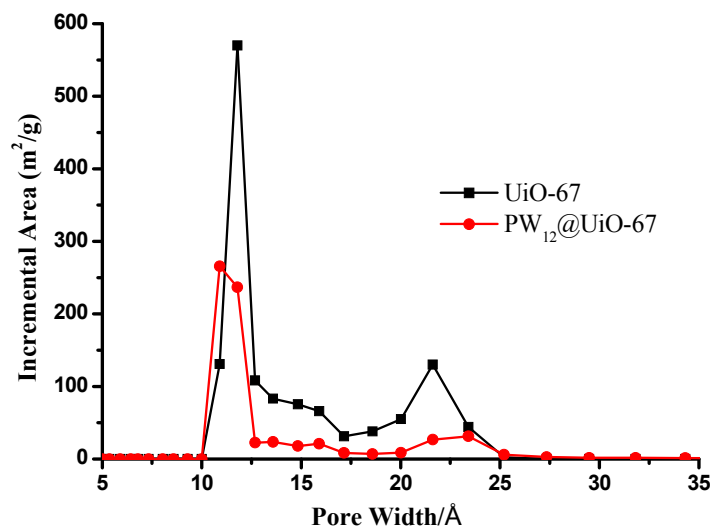

**Fig. S2** Density functional theory pore size distribution (PSD) profiles of UiO-67 and PW<sub>12</sub>@UiO-67.

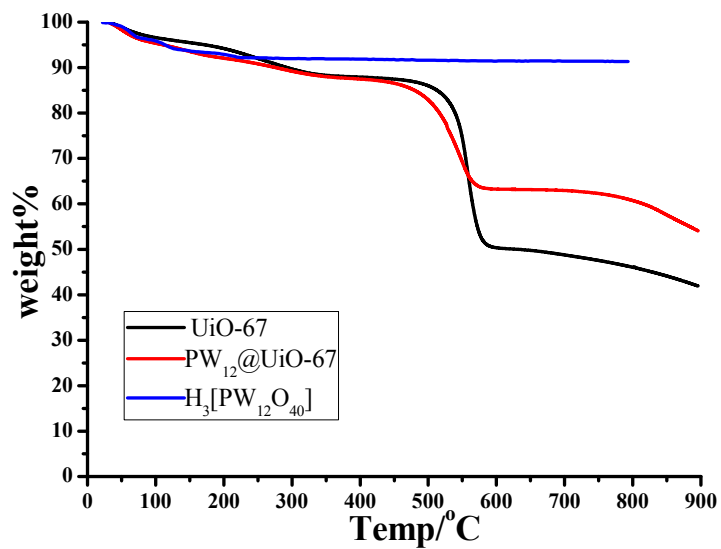

Fig. S3 TGA plots of H<sub>3</sub>PW<sub>12</sub>O<sub>40</sub>, UiO-67 and PW<sub>12</sub>@UiO-67.

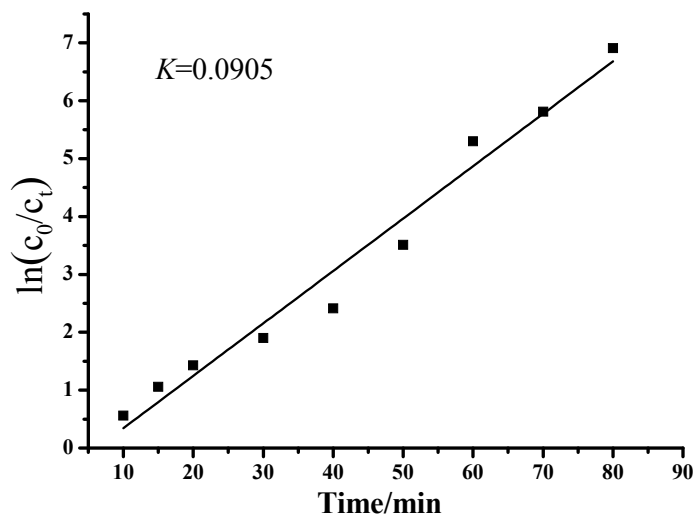

Fig. S4 Pseudo-first-order kinetic plot for the oxidation of DBT catalyzed by PW<sub>12</sub>@UiO-67 (reaction condition: 70 °C; O/S = 13).

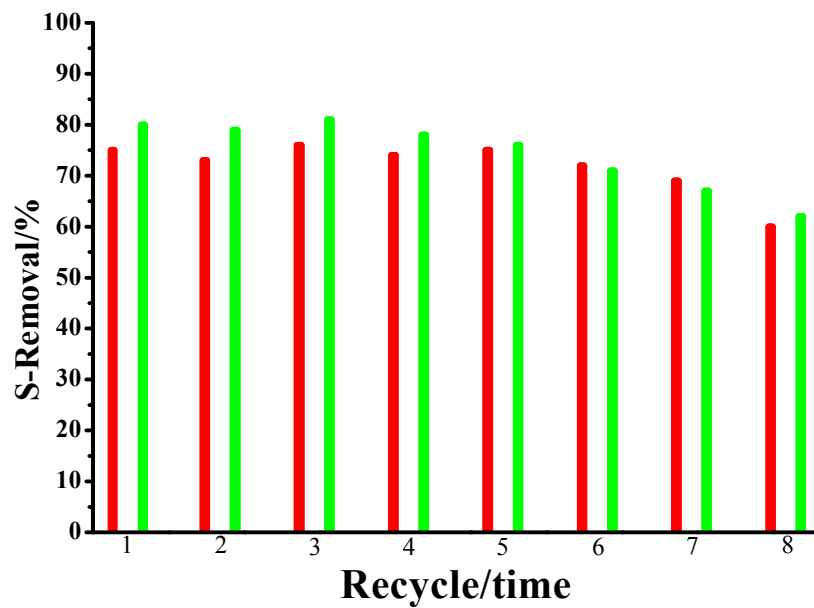

**Fig. S5** Removal rate of DBT (red) and 4, 6-DMDBT (green) among 8 consecutive catalytic reactions.

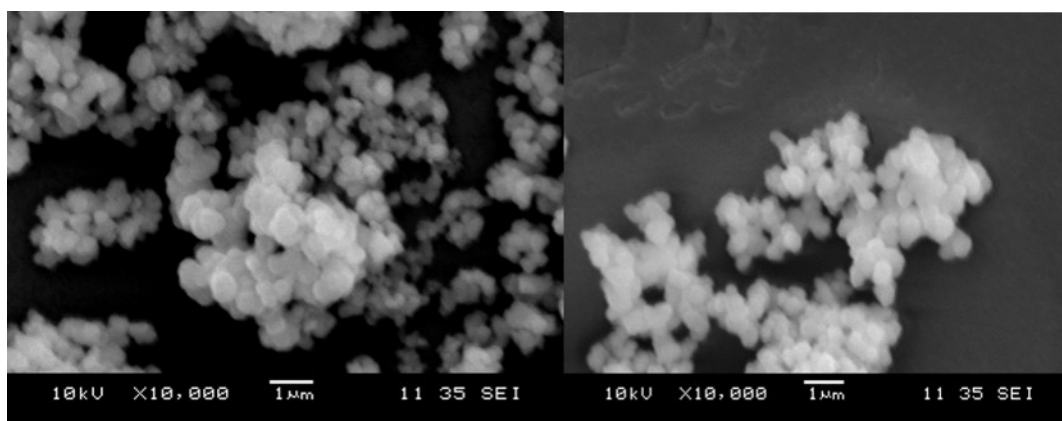

**Fig. S6** SEM images of UiO-67 (left) and PW<sub>12</sub>@UiO-67 (right).
